# Supplementary material for: An orphan protein of Fusarium graminearum modulates host immunity by mediating proteasomal degradation of TaSnRK1α
Source: PubMed Central journal article supplement (PMC7462860; doi:10.1038/s41467-020-18240-y), 2020-09-01
Supplement: 41467_2020_18240_MOESM1_ESM.pdf [file 41467_2020_18240_MOESM1_ESM.pdf]

**An orphan protein of *Fusarium graminearum* modulates host immunity by mediating proteasomal degradation of TaSnRK1 $\alpha$**

Cong Jiang<sup>1,2</sup>, Ruonan Hei<sup>1</sup>, Yang Yang<sup>1</sup>, Shijie Zhang<sup>3</sup>, Qihu Wang<sup>1</sup>, Wei Wang<sup>1</sup>, Qiang Zhang<sup>1</sup>, Min Yan<sup>1</sup>, Gengrui Zhu<sup>1</sup>, Panpan Huang<sup>1</sup>, Huiquan Liu<sup>1\*</sup> and Jin-Rong Xu<sup>2\*</sup>

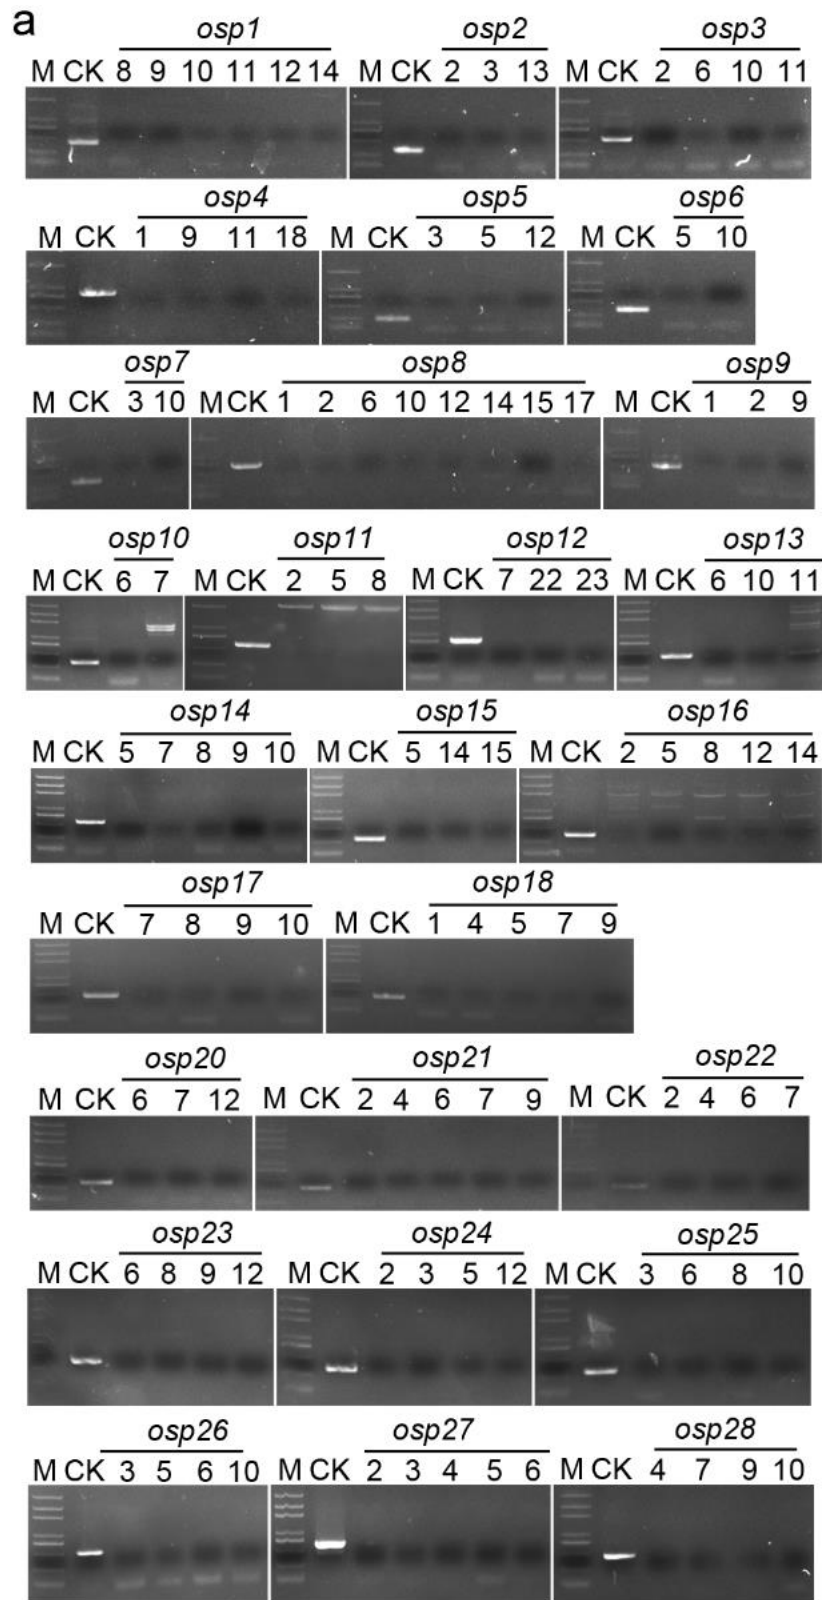

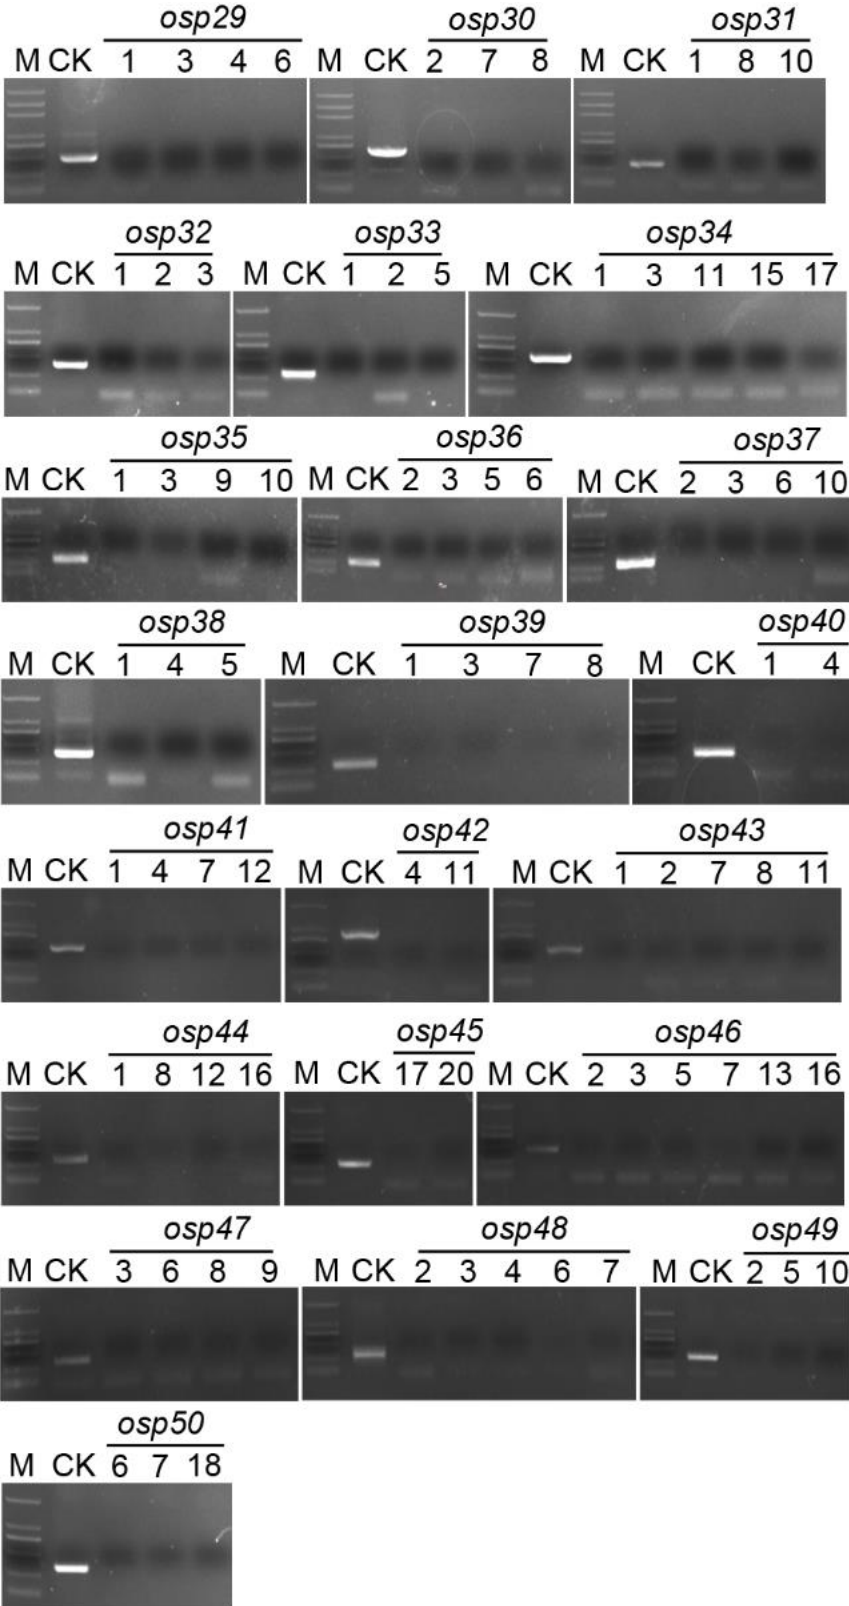

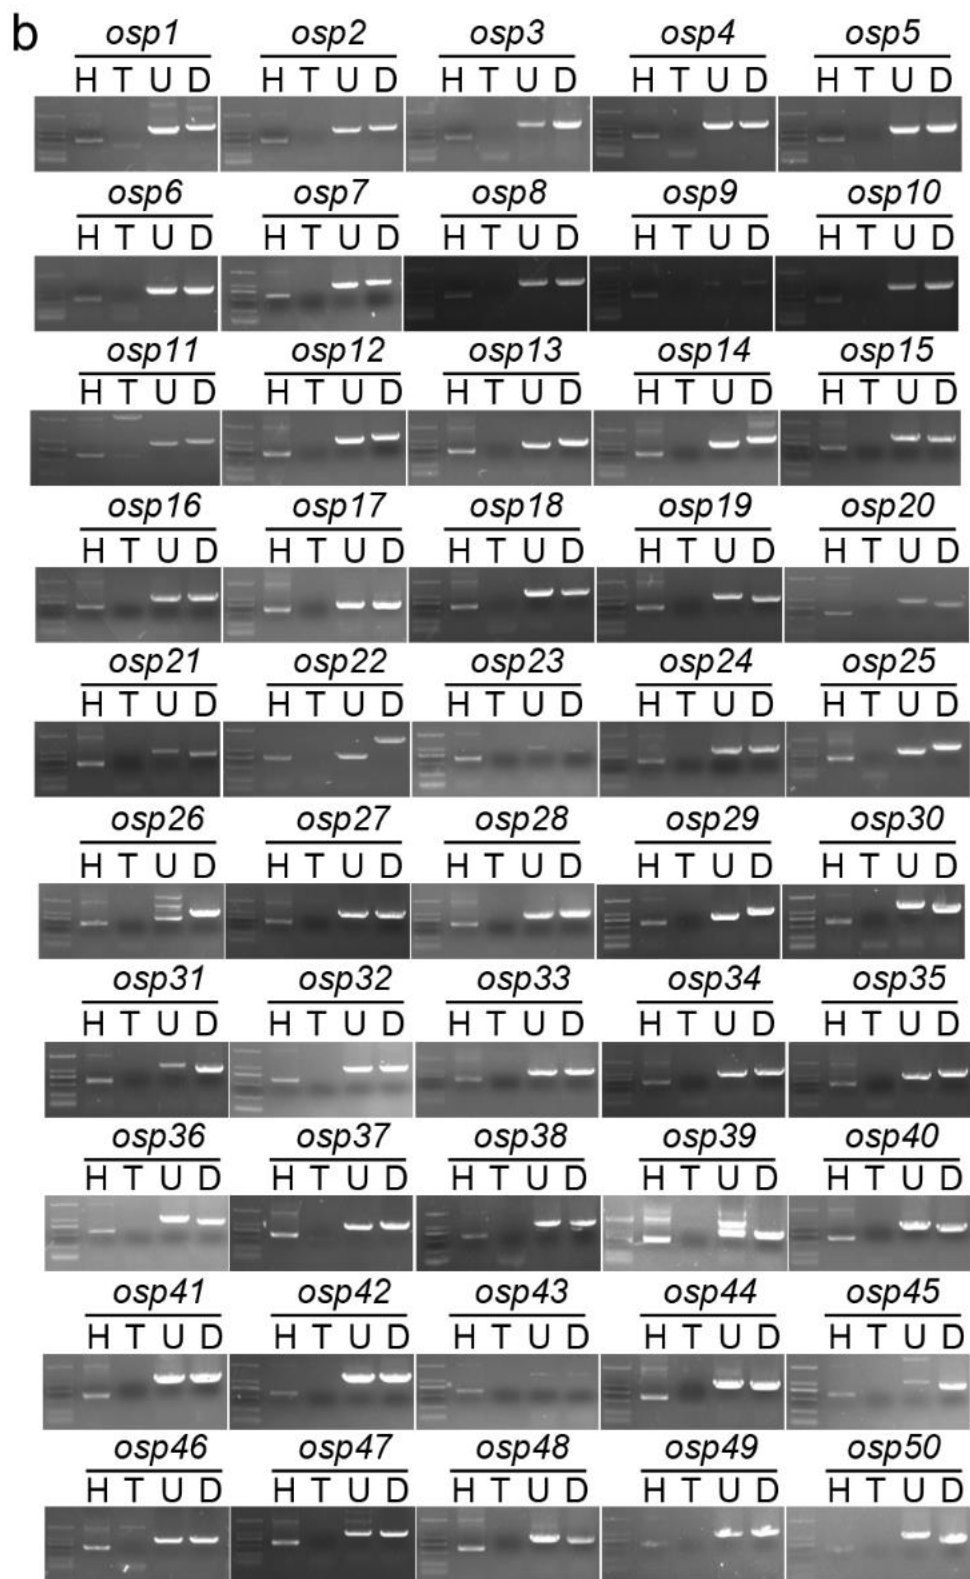

**Supplementary Figure 1.** Generation of gene replacement mutants of the *OSP* genes.

**a.** Deletion of the labelled *OSP* gene in the mutant strains listed in Supplementary Tables 1 was confirmed by the lack of PCR products amplified with primers 5F and 6R. M, molecular marker; CK, PH-1. **b.** PCR products amplified by primer pairs 7F/H4R (lane U) and H3F/8R (lane D) showed the occurrence of homologous recombination at the upstream and downstream flanking sequences of the labelled *OSP* gene, respectively, in the mutant strain selected for detailed analysis (marked in Supplementary Tables 1). Lane T was a repeat of PCR with primer pairs 5F and 6R to show the deletion of labelled *OSP* genes. Lane H showed the amplification of the *hph* gene with primers H1F and H2R. All the primers were described in Supplementary Table 7.

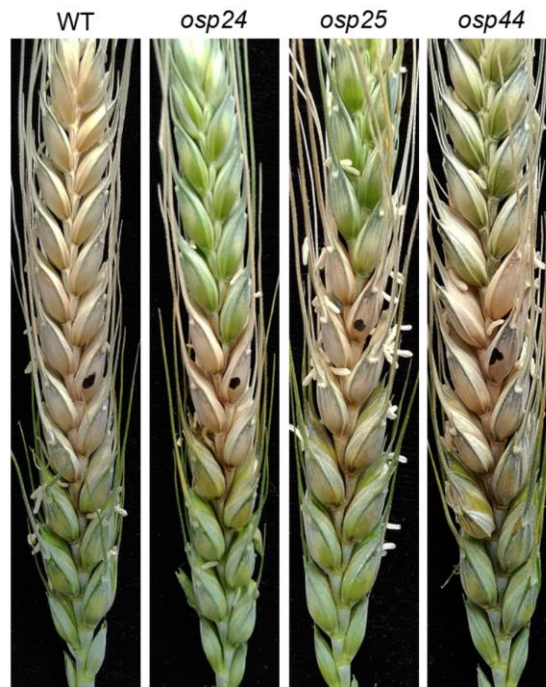

**Supplementary Figure 2.** Infection assays with wheat heads of cultivar Zhoumai 36.

Representative images of wheat heads of cultivar Zhoumai 36 infected with the wild type (PH-1) and the indicated *osp* mutants were photographed at 14 dpi.

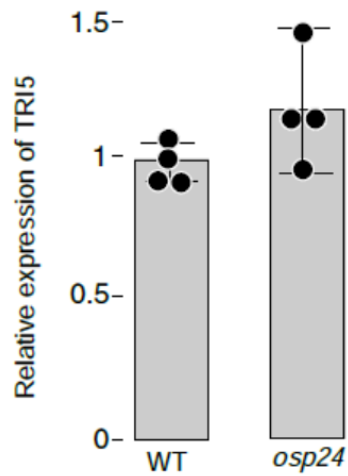

**Supplementary Figure 3.** Assays for *TRI5* expression by qRT-PCR.

Relative expression levels of *TRI5* were assayed by qRT-PCR with RNA isolated from inoculated and diseased spikelets from wheat heads inoculated with the wild type (WT) and *osp24* mutant.

The expression level in WT-infected samples was arbitrarily set to 1. Mean and standard deviation were estimated with data from four ( $n=4$ ) independent biological replicates (marked with black dots on the bars). No significant difference was observed based on Bootstrap analysis by BootstRatio ( $P=0.05$ ).

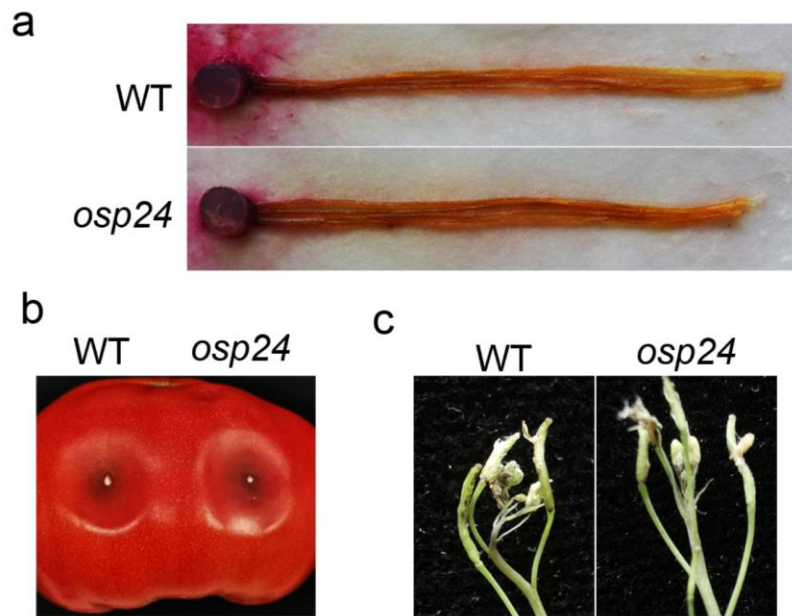

**Supplementary Figure 4.** Infection assays with corn silks, tomato fruits and Arabidopsis floral tissues.

Representative images of corn silks (a), tomato fruits (b) and Arabidopsis floral tissues (c) infected with the wild type (PH-1) and the *osp24* mutants were photographed at 7 dpi.



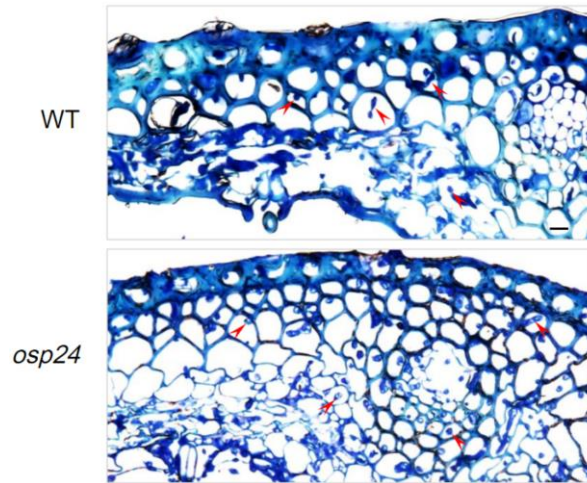

**Supplementary Figure 5.** Assays for invasive growth in wheat lemma

Wheat lemma were inoculated with the wild-type (WT) and *osp24* mutant strains and examined for invasive hyphae (marked with arrows) at 2 days post-inoculation (dpi). Scale bar, 20  $\mu\text{m}$ .

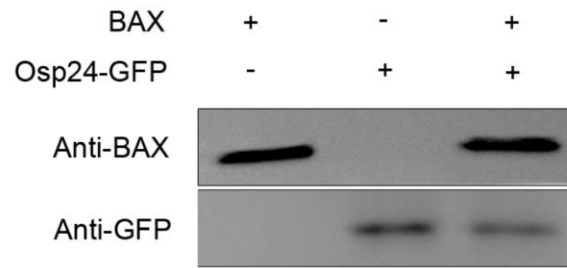

**Supplementary Figure 6.** Co-expression of BAX and Osp24-GFP in *N. benthamiana* leaves.

Western blots of proteins isolated from *N. benthamiana* leaves expressing BAX and/or

Osp24-GFP were detected with an anti-BAX or anti-GFP antibody.

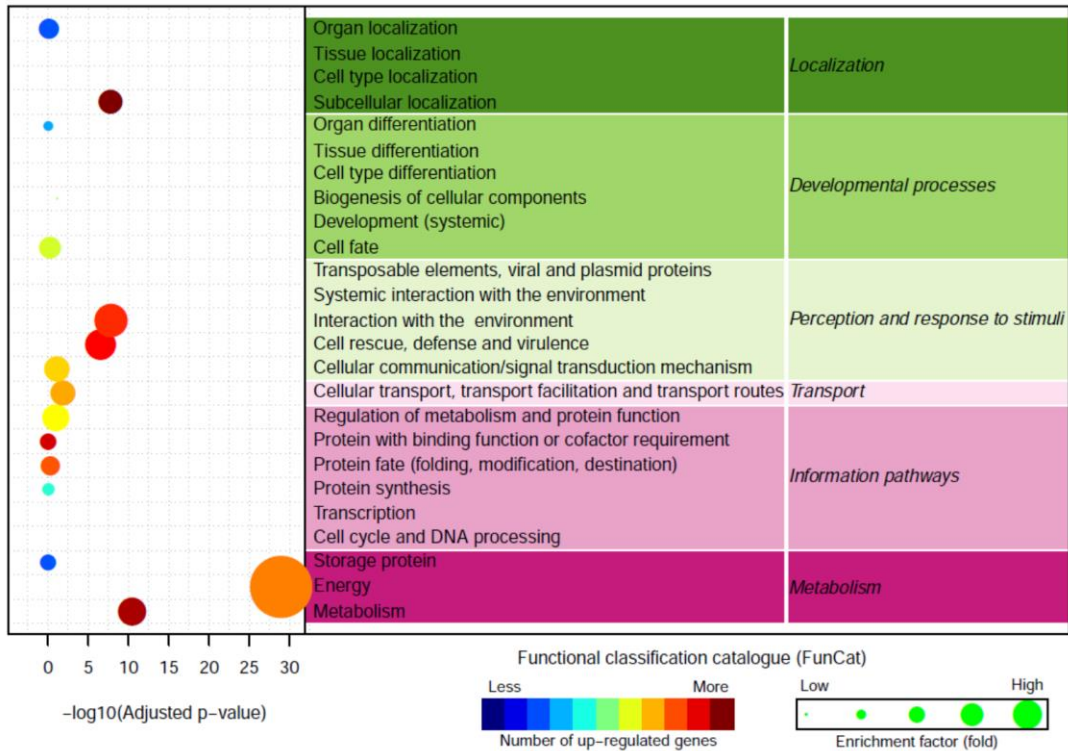

**Supplementary Figure 7.** FunCat enrichment analysis with DEGs up-regulated in *osp24*-infected wheat heads in comparison with wild type-inoculated samples. Genes functionally related to metabolism, information pathway, and perception and response to stimuli were significantly enriched.

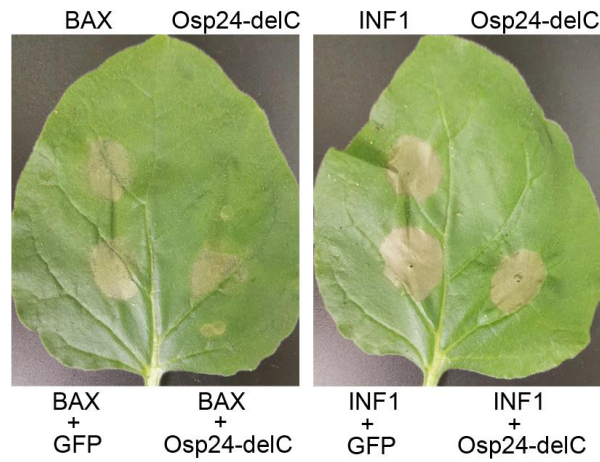

**Supplementary Figure 8.** Transient expression of truncated Osp24 failed to suppress programmed cell death triggered by BAX (left panel) or INF1 (right panel).

*N. benthamiana* leaves were infiltrated with *Agrobacterium* cells expressing GFP/BAX/INF1 alone or infiltrated with BAX/INF1-expressing cells at 18 h after infiltration with GFP or Osp24 truncated of its C-terminal region (Osp24-delC). Representative leaves were photographed at 5 days after infiltration.

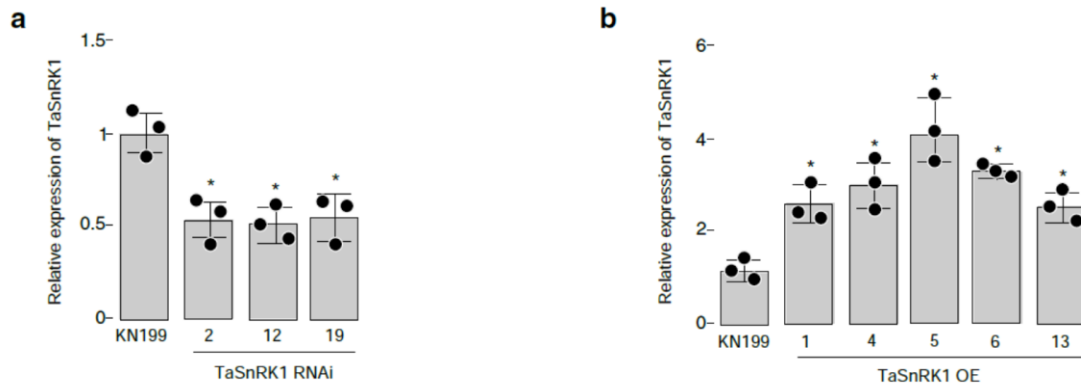

**Supplementary Figure 9.** Relative expression levels of TaSnRK1 $\alpha$  in the three RNAi (**a**) and five overexpression (**b**) transgenic lines detected by qRT-PCR. Mean and standard deviation were estimated with data from three ( $n=3$ ) independent replicates. Black dots on the bar represent the mean of each replicate. The asterisk \* indicates significant differences ( $P=0.05$ ) based on Bootstrap analysis by BootstRatio.

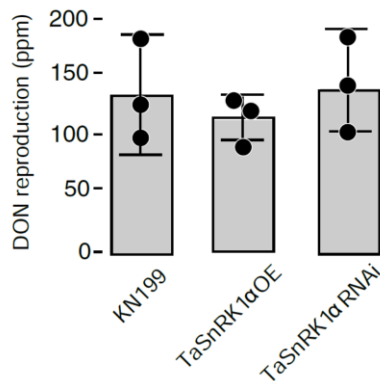

**Supplementary Figure 10.** DON levels in diseased wheat kernels of cultivar KN199 and its TaSnRK1 $\alpha$  OE or TaSnRK1 $\alpha$  RNAi transgenic plants.

DON was assayed with diseased wheat kernels inoculated with PH-1 that were collected from heads of cultivar KN199 and its TaSnRK1 $\alpha$  OE or TaSnRK1 $\alpha$  RNAi transgenic plants at 14 dpi.

Mean and standard deviations of DON levels were calculated with data from three ( $n=3$ )

independent replicates. No significant difference was observed based on ANOVA analysis

followed by Duncan's multiple range test ( $P=0.05$ ).

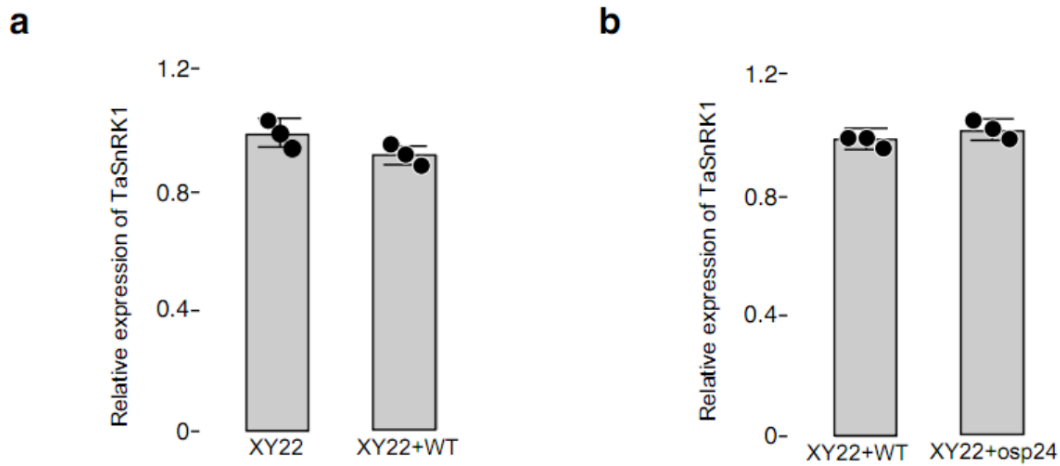

**Supplementary Figure 11.** Assays for the transcription levels of TaSnRK1 $\alpha$  during *F. graminearum* infection by qRT-PCR.

**a.** Relative expression levels of TaSnRK1 $\alpha$  in wheat heads of cultivar Xiaoyan 22

mock-inoculated with distilled water (XY22) or inoculated with PH-1 (XY22+WT). **b.**

Relative expression levels of TaSnRK1 $\alpha$  in wheat heads of cultivar Xiaoyan 22 mock-inoculated

with distilled water (XY22) or inoculated with the *osp24* mutant (XY22+*osp24*). Mean and

standard deviation were estimated with data from three ( $n=3$ ) independent replicates. Black

dots on the bar represent the mean of each replicate. No significant difference was observed

based on Bootstrap analysis by BootstRatio ( $P=0.05$ ).

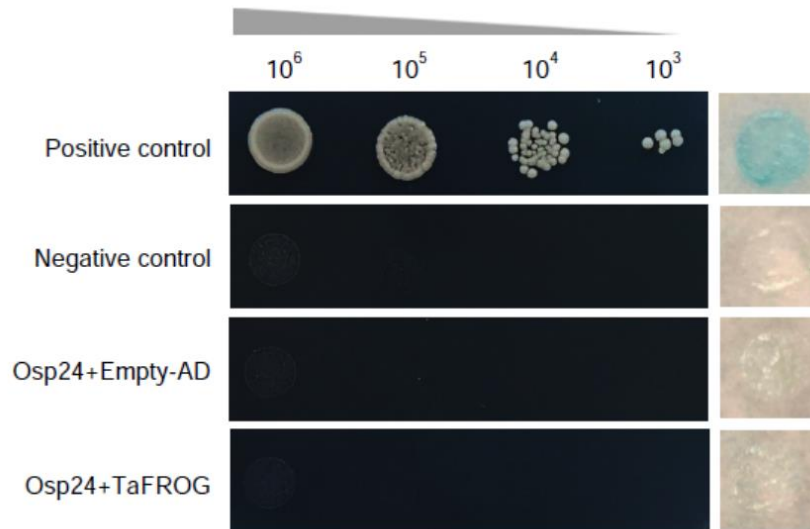

**Supplementary Figure 12.** Yeast two-hybrid assays for the interaction of Osp24 (Bait) with TaFROG (Prey). Different concentrations of the labeled yeast transformants were assayed for growth on SD-Trp-Leu-His plates and LacZ activity.



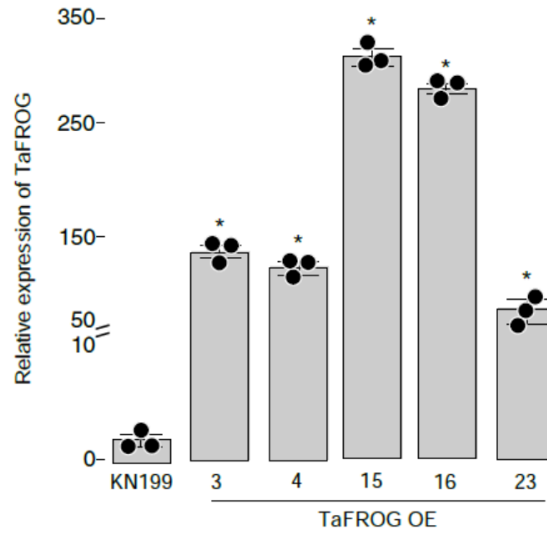

**Supplementary Figure 13.** Relative expression levels of TaFROG in five overexpression transgenic lines assayed by qRT-PCR. Mean and standard deviation were estimated with data from three ( $n=3$ ) independent replicates. Black dots on the bar represent the mean of each replicate. The asterisk \* indicates significant differences ( $P=0.05$ ) based on Bootstrap analysis by BootstRatio analysis.

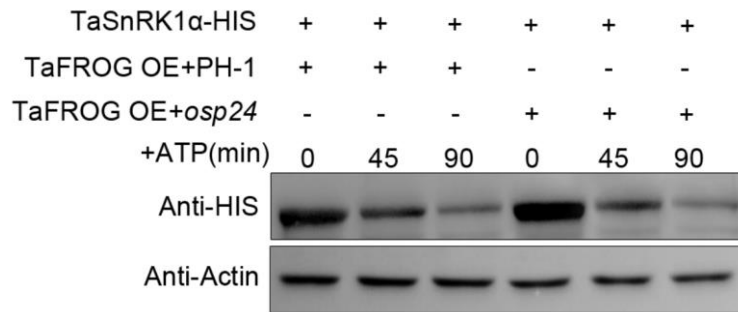

**Supplementary Figure 14.** Cell-free degradation assays with recombinant TaSnRK1 $\alpha$ -HIS proteins.

Recombinant TaSnRK1 $\alpha$ -HIS proteins were incubated with equal amounts of total proteins isolated from wheat heads of TaFROG OE transgenic plants (infected with PH-1 or the *osp24* mutant) for the indicated time after addition of 10 mM ATP. Western blots were detected with an anti-actin or anti-HIS antibody.

**Supplementary Table 1. Deletion mutants of *OSP* genes generated in this study.**

| Gene name | Gene locus number | Number of mutant strains *   |
|-----------|-------------------|------------------------------|
| OSP1      | FGSG_00770        | 8, <b>9</b> ,10,11,12,14     |
| OSP2      | FGSG_01218        | <b>2</b> ,3,13               |
| OSP3      | FGSG_02021        | <b>2</b> ,6,10,11            |
| OSP4      | FGSG_02914        | 1, <b>9</b> ,11,17,18        |
| OSP5      | FGSG_02957        | <b>3</b> ,5,12               |
| OSP6      | FGSG_03196        | <b>5</b> ,10                 |
| OSP7      | FGSG_04687        | <b>3</b> ,10                 |
| OSP8      | FGSG_04766        | <b>1</b> ,2,6,10,12,14,15,17 |
| OSP9      | FGSG_05241        | <b>1</b> ,2,5,9              |
| OSP10     | FGSG_06650        | <b>6</b> ,7                  |
| OSP11     | FGSG_06780        | 2, <b>5</b> ,8               |
| OSP12     | FGSG_07221        | <b>7</b> ,22,23              |
| OSP13     | FGSG_07403        | <b>6</b> ,7,10,11            |
| OSP14     | FGSG_07670        | <b>5</b> ,7,8,9,10           |
| OSP15     | FGSG_07972        | <b>5</b> ,7,14,15            |
| OSP16     | FGSG_08210        | 2, <b>5</b> ,8,12,14         |
| OSP17     | FGSG_08332        | 7, <b>8</b> ,9,10,12,16      |
| OSP18     | FGSG_08512        | 1,4,5,7, <b>9</b>            |
| OSP19     | FGSG_08908        | 4, <b>6</b> ,9,11,12         |
| OSP20     | FGSG_10079        | 6,7, <b>12</b>               |
| OSP21     | FGSG_10112        | <b>2</b> ,4,6,7,9            |
| OSP22     | FGSG_11077        | <b>5</b> ,6,8                |
| OSP23     | FGSG_11418        | <b>6</b> ,8,9,12             |
| OSP24     | FGSG_11564        | <b>2</b> ,3,5,12             |
| OSP25     | FGSG_11647        | <b>3</b> ,6,8,10             |
| OSP26     | FGSG_11769        | 3,5, <b>6</b> ,10            |
| OSP27     | FGSG_11910        | <b>2</b> ,3,4,5,6            |
| OSP28     | FGSG_12020        | <b>4</b> ,7,9,12             |
| OSP29     | FGSG_12045        | <b>1</b> ,3,4,6              |
| OSP30     | FGSG_12146        | 2,7, <b>8</b>                |
| OSP31     | FGSG_12249        | 1,8, <b>10</b>               |
| OSP32     | FGSG_12259        | <b>1</b> ,2,3                |
| OSP33     | FGSG_12722        | 1,2, <b>5</b>                |
| OSP34     | FGSG_12805        | <b>1</b> ,3,11,15,17         |
| OSP35     | FGSG_12822        | 1,3, <b>9</b> ,10            |
| OSP36     | FGSG_12932        | <b>2</b> ,3,5,6              |
| OSP37     | FGSG_12981        | 2,3, <b>6</b> ,10            |
| OSP38     | FGSG_13021        | <b>1</b> ,4,5                |
| OSP39     | FGSG_13067        | 1,3,7, <b>8</b>              |
| OSP40     | FGSG_13115        | <b>16</b> ,19                |
| OSP41     | FGSG_13244        | 1,4,7,12                     |
| OSP42     | FGSG_13407        | 4,11                         |
| OSP43     | FGSG_13412        | 1,2,7, <b>8</b> ,11          |
| OSP44     | FGSG_13464        | 1,8,12, <b>16</b>            |
| OSP45     | FGSG_13505        | 17,20                        |
| OSP46     | FGSG_13576        | <b>2</b> ,3,5,7,13,16        |
| OSP47     | FGSG_13635        | <b>3</b> ,6,8,9              |
| OSP48     | FGSG_13774        | 2, <b>3</b> ,4,6,7           |
| OSP49     | FGSG_13782        | <b>2</b> ,5,10               |
| OSP50     | FGSG_13899        | <b>6</b> ,7,18               |

\* The mutant strains selected for detailed analysis were in bold.

**Supplementary Table 2. Phenotypes of the osp deletion mutants with reduced virulence**

| Gene name    | Disease index | Growth rate | Conidiation | Perithecium formation | DON production * |
|--------------|---------------|-------------|-------------|-----------------------|------------------|
| <i>OSP4</i>  | 78±11.8%      | 101.6±0.8%  | 92.4±1.7%   | Normal                | 96.2±24.3%       |
| <i>OSP8</i>  | 88.1±5.9%     | 98.4±0.8%   | 111±1.7%    | Normal                | 103.7±13%        |
| <i>OSP13</i> | 87.3±9.7%     | 100.8±2.4%  | 98.3±12.7%  | Normal                | 91.6±4.6%        |
| <i>OSP19</i> | 82.2±18.2%    | 99.2±2.4%   | 95.8±2.5%   | Normal                | 90.2±9.4%        |
| <i>OSP24</i> | 49.1±4.7%     | 99.2±1.6%   | 104.2±13.6% | Normal                | 100.3±5%         |
| <i>OSP25</i> | 62.9±5.0%     | 99.2±3.2%   | 100±4.2%    | Normal                | 97.5±5.6%        |
| <i>OSP29</i> | 84.7±22.8%    | 103.2±1.6%  | 96.7±7.6%   | Normal                | 102.9±12.4%      |
| <i>OSP33</i> | 89.8±20.3%    | 97.6±2.4%   | 109.3±2.5%  | Normal                | 93.9±2.8%        |
| <i>OSP36</i> | 86.4±16.9%    | 99.2±2.4%   | 90.7±3.4%   | Normal                | 104.4±24.9%      |
| <i>OSP40</i> | 89±14.4%      | 101.6±0.8%  | 105.9±9.3%  | Normal                | 99.7±13%         |
| <i>OSP44</i> | 64.4±7.4%     | 100±1.6%    | 95.8±11%    | Normal                | 101.6±8.9%       |

\*The disease index, growth rate, conidiation, perithecium formation, DON production were assayed with three independent replicates for all the strains. For each mutant, the percentage of changes was in comparison with PH-1 (arbitrarily set to 100%).

**Supplementary Table 3. Expression profiles of the 50 OSP genes in *Fusarium graminearum*.**

| Gene name | Gene locus number | Hyphae_1* | Hyphae_2 | Perithecia_1 | Perithecia_2 | Infection_1 | Infection_2 |
|-----------|-------------------|-----------|----------|--------------|--------------|-------------|-------------|
| OSP1      | FGSG_00770        | 0.69      | 0.98     | 20.03        | 14.56        | 4.15        | 1.55        |
| OSP2      | FGSG_01218        | 0.00      | 0.00     | 0.00         | 0.00         | 0.00        | 0.00        |
| OSP3      | FGSG_02021        | 0.68      | 0.58     | 2.85         | 3.51         | 2.20        | 2.27        |
| OSP4      | FGSG_02914        | 0.08      | 0.32     | 0.00         | 0.00         | 47.74       | 52.12       |
| OSP5      | FGSG_02957        | 0.39      | 0.00     | 0.00         | 0.00         | 0.00        | 0.00        |
| OSP6      | FGSG_03196        | 0.26      | 0.00     | 0.73         | 0.84         | 0.94        | 0.00        |
| OSP7      | FGSG_04687        | 0.00      | 0.00     | 0.00         | 0.23         | 0.00        | 0.00        |
| OSP8      | FGSG_04766        | 0.00      | 0.00     | 8.28         | 6.63         | 0.00        | 0.00        |
| OSP9      | FGSG_05241        | 0.12      | 0.06     | 0.81         | 0.61         | 0.10        | 0.05        |
| OSP10     | FGSG_06650        | 0.36      | 0.77     | 0.51         | 1.17         | 0.97        | 0.30        |
| OSP11     | FGSG_06780        | 0.00      | 0.27     | 0.00         | 0.21         | 0.00        | 0.00        |
| OSP12     | FGSG_07221        | 2.81      | 1.51     | 2.26         | 4.89         | 7.99        | 8.78        |
| OSP13     | FGSG_07403        | 0.00      | 0.00     | 0.00         | 0.00         | 0.00        | 0.00        |
| OSP14     | FGSG_07670        | 1.18      | 1.16     | 2.07         | 1.91         | 5.85        | 5.94        |
| OSP15     | FGSG_07972        | 0.00      | 0.22     | 0.00         | 0.34         | 0.37        | 0.00        |
| OSP16     | FGSG_08210        | 0.00      | 0.18     | 0.00         | 0.00         | 31.33       | 25.01       |
| OSP17     | FGSG_08332        | 0.00      | 0.00     | 0.25         | 0.19         | 0.00        | 0.00        |
| OSP18     | FGSG_08512        | 0.39      | 0.42     | 1.93         | 2.23         | 1.77        | 3.30        |
| OSP19     | FGSG_08908        | 0.00      | 0.38     | 0.40         | 0.11         | 0.64        | 0.95        |
| OSP20     | FGSG_10079        | 0.00      | 0.00     | 0.45         | 0.52         | 0.29        | 0.00        |
| OSP21     | FGSG_10112        | 1.25      | 1.78     | 3.79         | 5.73         | 0.75        | 1.05        |
| OSP22     | FGSG_11077        | 1.02      | 0.14     | 0.54         | 0.62         | 8.30        | 7.72        |
| OSP23     | FGSG_11418        | 1.42      | 2.19     | 0.22         | 0.00         | 0.00        | 0.00        |
| OSP24     | FGSG_11564        | 157.46    | 17.35    | 0.26         | 0.30         | 290.77      | 310.82      |
| OSP25     | FGSG_11647        | 0.00      | 0.00     | 0.00         | 0.35         | 39.41       | 54.24       |
| OSP26     | FGSG_11769        | 0.00      | 0.13     | 0.33         | 0.39         | 0.00        | 0.80        |
| OSP27     | FGSG_11910        | 6.85      | 3.30     | 0.48         | 1.11         | 0.31        | 0.00        |
| OSP28     | FGSG_12020        | 0.65      | 0.47     | 5.67         | 4.25         | 1.97        | 1.10        |
| OSP29     | FGSG_12045        | 0.00      | 0.25     | 0.00         | 0.38         | 0.00        | 0.00        |
| OSP30     | FGSG_12146        | 0.38      | 0.21     | 4.31         | 1.25         | 1.04        | 2.58        |
| OSP31     | FGSG_12249        | 3.36      | 2.64     | 1.89         | 0.36         | 0.40        | 0.00        |
| OSP32     | FGSG_12259        | 0.00      | 0.00     | 0.00         | 0.77         | 0.00        | 0.40        |
| OSP33     | FGSG_12722        | 2.66      | 2.09     | 3.49         | 2.30         | 0.96        | 0.89        |
| OSP34     | FGSG_12805        | 0.00      | 0.00     | 0.00         | 0.00         | 0.00        | 0.00        |
| OSP35     | FGSG_12822        | 0.00      | 0.00     | 0.00         | 0.00         | 0.00        | 0.29        |
| OSP36     | FGSG_12932        | 9.50      | 10.17    | 10.84        | 17.35        | 2.14        | 3.99        |
| OSP37     | FGSG_12981        | 1.52      | 4.06     | 23.43        | 23.80        | 2.74        | 10.19       |
| OSP38     | FGSG_13021        | 0.00      | 0.00     | 1.52         | 2.11         | 0.00        | 0.00        |
| OSP39     | FGSG_13067        | 0.25      | 0.27     | 2.13         | 0.41         | 0.00        | 0.00        |
| OSP40     | FGSG_13115        | 0.45      | 0.00     | 1.89         | 4.73         | 2.02        | 0.75        |
| OSP41     | FGSG_13244        | 0.00      | 0.00     | 0.88         | 0.00         | 0.00        | 0.00        |
| OSP42     | FGSG_13407        | 0.10      | 0.07     | 29.96        | 26.24        | 2.78        | 3.34        |
| OSP43     | FGSG_13412        | 1034.63   | 1279.47  | 4.63         | 2.56         | 2.07        | 0.72        |
| OSP44     | FGSG_13464        | 1.12      | 4.20     | 26.01        | 35.06        | 1109.59     | 1087.15     |
| OSP45     | FGSG_13505        | 0.00      | 0.00     | 7.43         | 2.24         | 71.86       | 53.31       |
| OSP46     | FGSG_13576        | 1.09      | 0.50     | 0.66         | 0.00         | 1.12        | 1.31        |
| OSP47     | FGSG_13635        | 0.23      | 0.00     | 0.00         | 0.37         | 0.42        | 0.00        |
| OSP48     | FGSG_13774        | 1.37      | 0.24     | 0.96         | 0.37         | 1.23        | 0.00        |
| OSP49     | FGSG_13782        | 0.26      | 0.00     | 1.83         | 3.81         | 49.40       | 48.13       |
| OSP50     | FGSG_13899        | 0.00      | 0.00     | 0.00         | 0.35         | 0.00        | 0.00        |

\* TPM (Transcripts Per Kilobase Million) values from RNA-seq data of two replicates of vegetative hyphae (Hyphae), 3-dpf perithecia (perithecia), and infected wheat heads (Infection) from two previous studies (Liu et al., 2016; Jiang et al., 2019).

**Supplementary Table 4. Osp24-interacting clones (OIC) identified by yeast two-hybrid library screening.**

| <b>Name</b>    | <b>Clonies</b> | <b>Annotation</b>                                  |
|----------------|----------------|----------------------------------------------------|
| TaSnRK1 (OIC1) | 4,6,11,18,23   | SNF1-related protein kinase 1                      |
| OIC2           | 2,15,19,20     | SGT1 (suppressor of the G2 allele of <i>skp1</i> ) |
| OIC3           | 1              | S-acyltransferase 23                               |
| OIC4           | 8              | Peroxisome biogenesis protein 5                    |
| OIC5           | 14             | Ribosomal protein L7                               |
| OIC6           | 5,30           | Phosphoglycolate phosphatase                       |
| OIC7           | 25             | Blue copper-binding protein                        |
| OIC8           | 12             | Pre-mRNA-splicing factor SLU7                      |
